# Supplementary material for: Artificial vitriols: a contemporary interpretation of historical ingredients
Source: Royal Society of Chemistry journal article supplement (doi:10.1039/d4ra01896f), 2024-01-01
Supplement: d4ra01896f1.pdf [file d4ra01896f1.pdf]

## Supporting Information

### Artificial Vitriols: A Contemporary Interpretation of Historical Ingredients

Giacomo Montanari <sup>\*a</sup>, Marianna Marchini <sup>b</sup>, Matteo Martelli <sup>a</sup>, and Lucia Maini <sup>\*b</sup>

*a. Department of Philosophy, University of Bologna, Italy*

*b. Department of Chemistry "G. Ciamician", University of Bologna, Italy*

#### Ancient sources

**Text 1.** Bayerische Staatsbibliothek, 2 Inc.s.a. 907, Nicolaus Salernitanus and Mesuë. *Antidotarium*. Straßburg: [Johann Prüss], 1478. fol. 74r, col. 2, ll. 3-7

Normalization and translation: G. Montanari

[...] et discernitur illud quod est alteratum cum vitriolo ponendo ipsum in lamina ferrea supra igne, et si continet aliquid vitriolum qui erit combustum, ustum fiet rubeum.

[...] and what is altered with vitriol is known by placing it on an iron sheet over a fire, and if it contains any vitriol that will be burnt, the burned remains will be red.

**Text 2.** AAVV, *Antidotarium Collegii Medicorum Bononiensis*, Venice: [Niccolò Pezzana], 1773, p. 153

Normalization and translation G. Montanari

VITRIOLUM RUBIFICATUM sive Colcothar

Vitrioli calcinati ad albedinem - quantum placet

Tractetur igne reverberii, dum colorem acquirat obscure rubentem. Est etiam verum Colcothar id quod remanet in retorta ab extractione Spiritus et Olei Vitrioli.

Reddened Vitriol or Colchotar

Vitriol calcined to whiteness - as you like

Treat it with a reverberating fire, until it acquires a dark red color. It is also true Colchotar what remains in the retort after the extraction of Spirit and Oil of Vitriol.

#### List of phases for identification retrived in COD ( Crystallographic Open Database)

| Phase        | COD Code | Ref. | Reference                                                                                                |
|--------------|----------|------|----------------------------------------------------------------------------------------------------------|
| Melanterite  | 9007482  |      | Baur, W. H. Baur, <i>Acta Crystallogr.</i> , 1964, <b>17</b> , 1167-1174                                 |
| Rozenite     | 9007473  |      | Baur, W. H. Baur, <i>Acta Crystallogr.</i> , 1962, <b>15</b> , 815-826                                   |
| Szomolnokite | 9009370  |      | M. Wildner, G. Giester, <i>Neues Jahrbuch fur Mineralogie, Monatshefte</i> , 1991, <b>1991</b> , 296-306 |
| IS(OH)       | 9003662  |      | G. Johansson, <i>Acta Chem. Scand.</i> , 1962, <b>16</b> , 1234-1244                                     |

|                  |         |                                                                                                                   |
|------------------|---------|-------------------------------------------------------------------------------------------------------------------|
| <b>Hematite</b>  | 2101167 | E. N. Maslen, V. A. Streltsov, N. R. Streltsova, N. Ishizawa, Acta Crystallogr. Sec. B, 1994, <b>50</b> , 435-441 |
| <b>Mikasaite</b> | 9008258 | P. C. Christidis, P. J. Rentzeperis, Zeitschrift fur Kristallographie, 1976, <b>144</b> , 341-352                 |

**Table S1.** COD reference codes for the structural data used as a starting point in the Rietveld refinements.

## Rietveld refinements

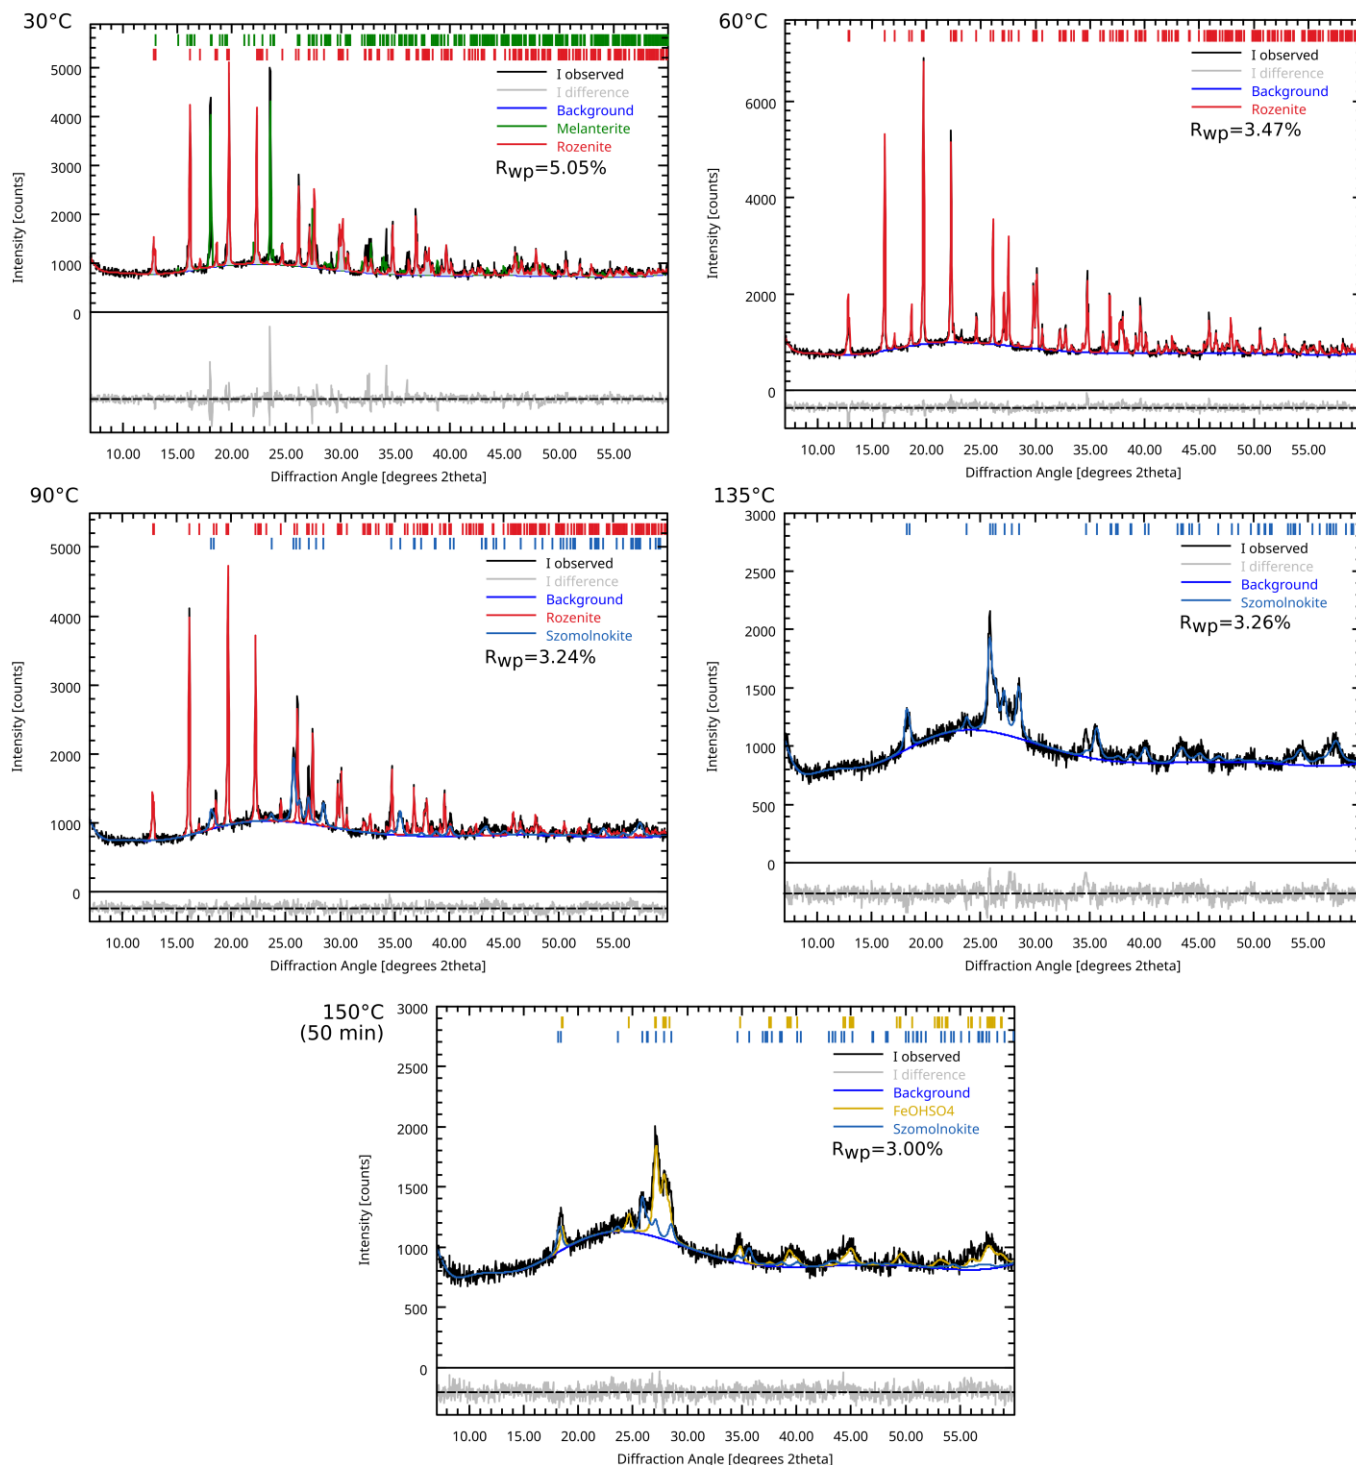

**Figure S1.** Selected XRPD pattern from the VTXRPD experiment; the structural data necessary to perform the Rietveld refinements were taken from the Crystallographic Open Database (reference codes given in Tab. S1).

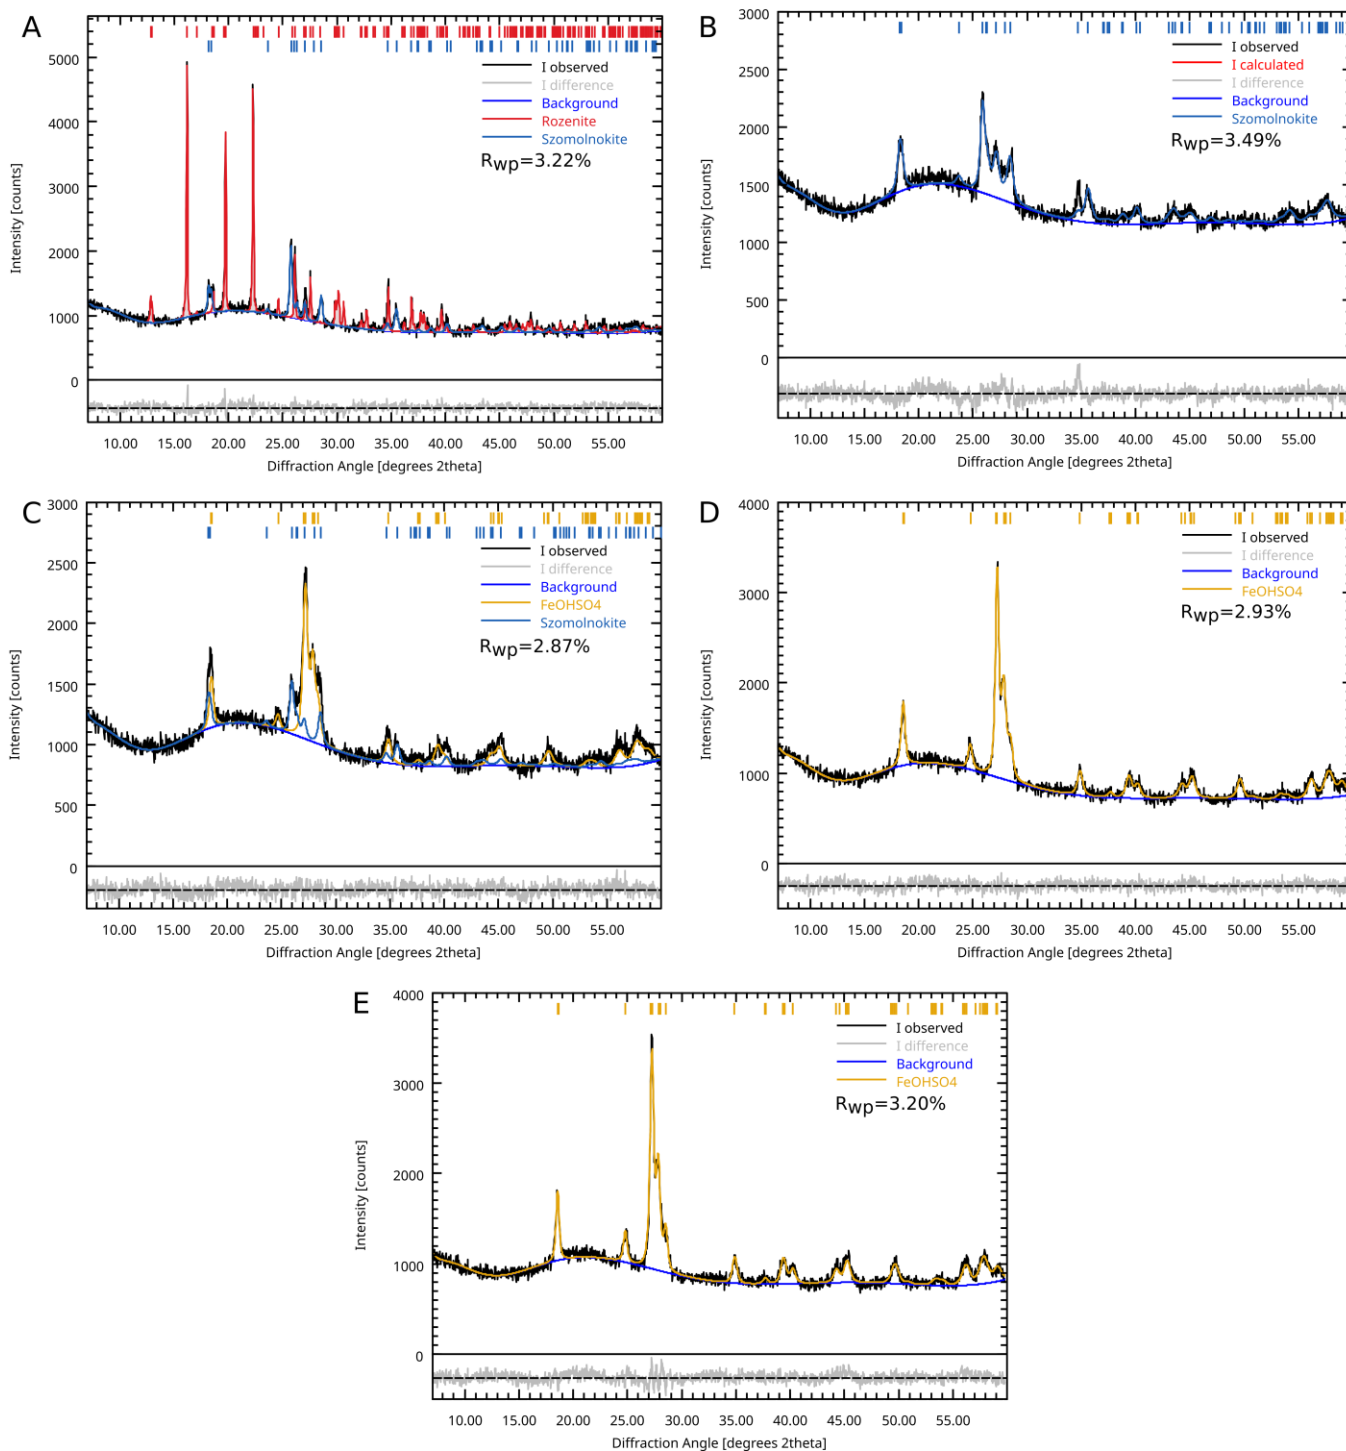

**Figure S2.** XRPD patterns of samples A-E from the Kofler bench. Rietveld refinement for each phase was performed using COD structural data (see Tab. S1)

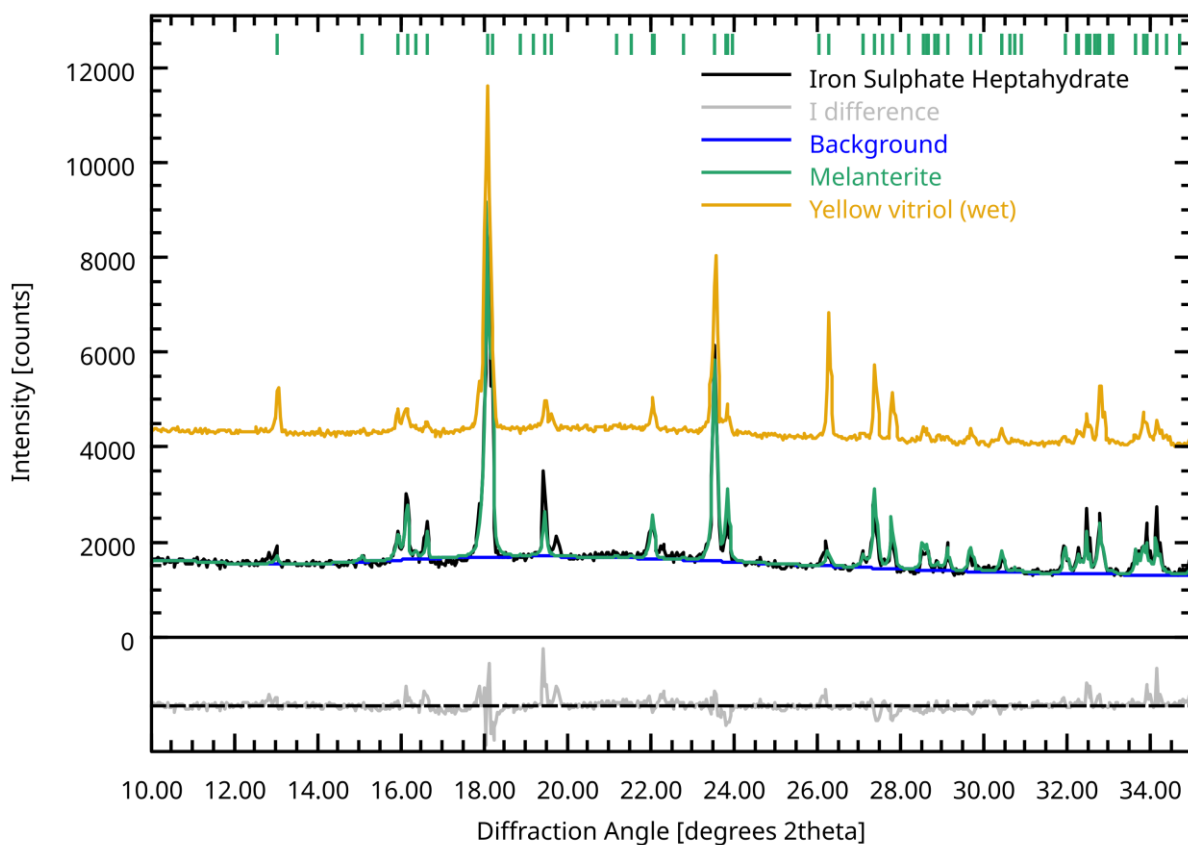

**Figure S3.** XRPD pattern comparison between iron sulphate heptahydrate starting material (black) and yellow vitriol obtained by wet method (yellow). Starting material was identified as melanterite (green); the melanterite phase was refined with the Rietveld method (see Tab. S1 for COD ref. code) against the starting material pattern with an  $R_{wp}$  of 5.55%, and against the yellow vitriol with an  $R_{wp}$  of 8.20%; this worse parameter is seemingly due to a marked preferred orientation for the (h00) planes, ( $13.05^\circ$ ,  $19.65^\circ$ , and  $39.90^\circ 2\theta$  respectively), in the product.

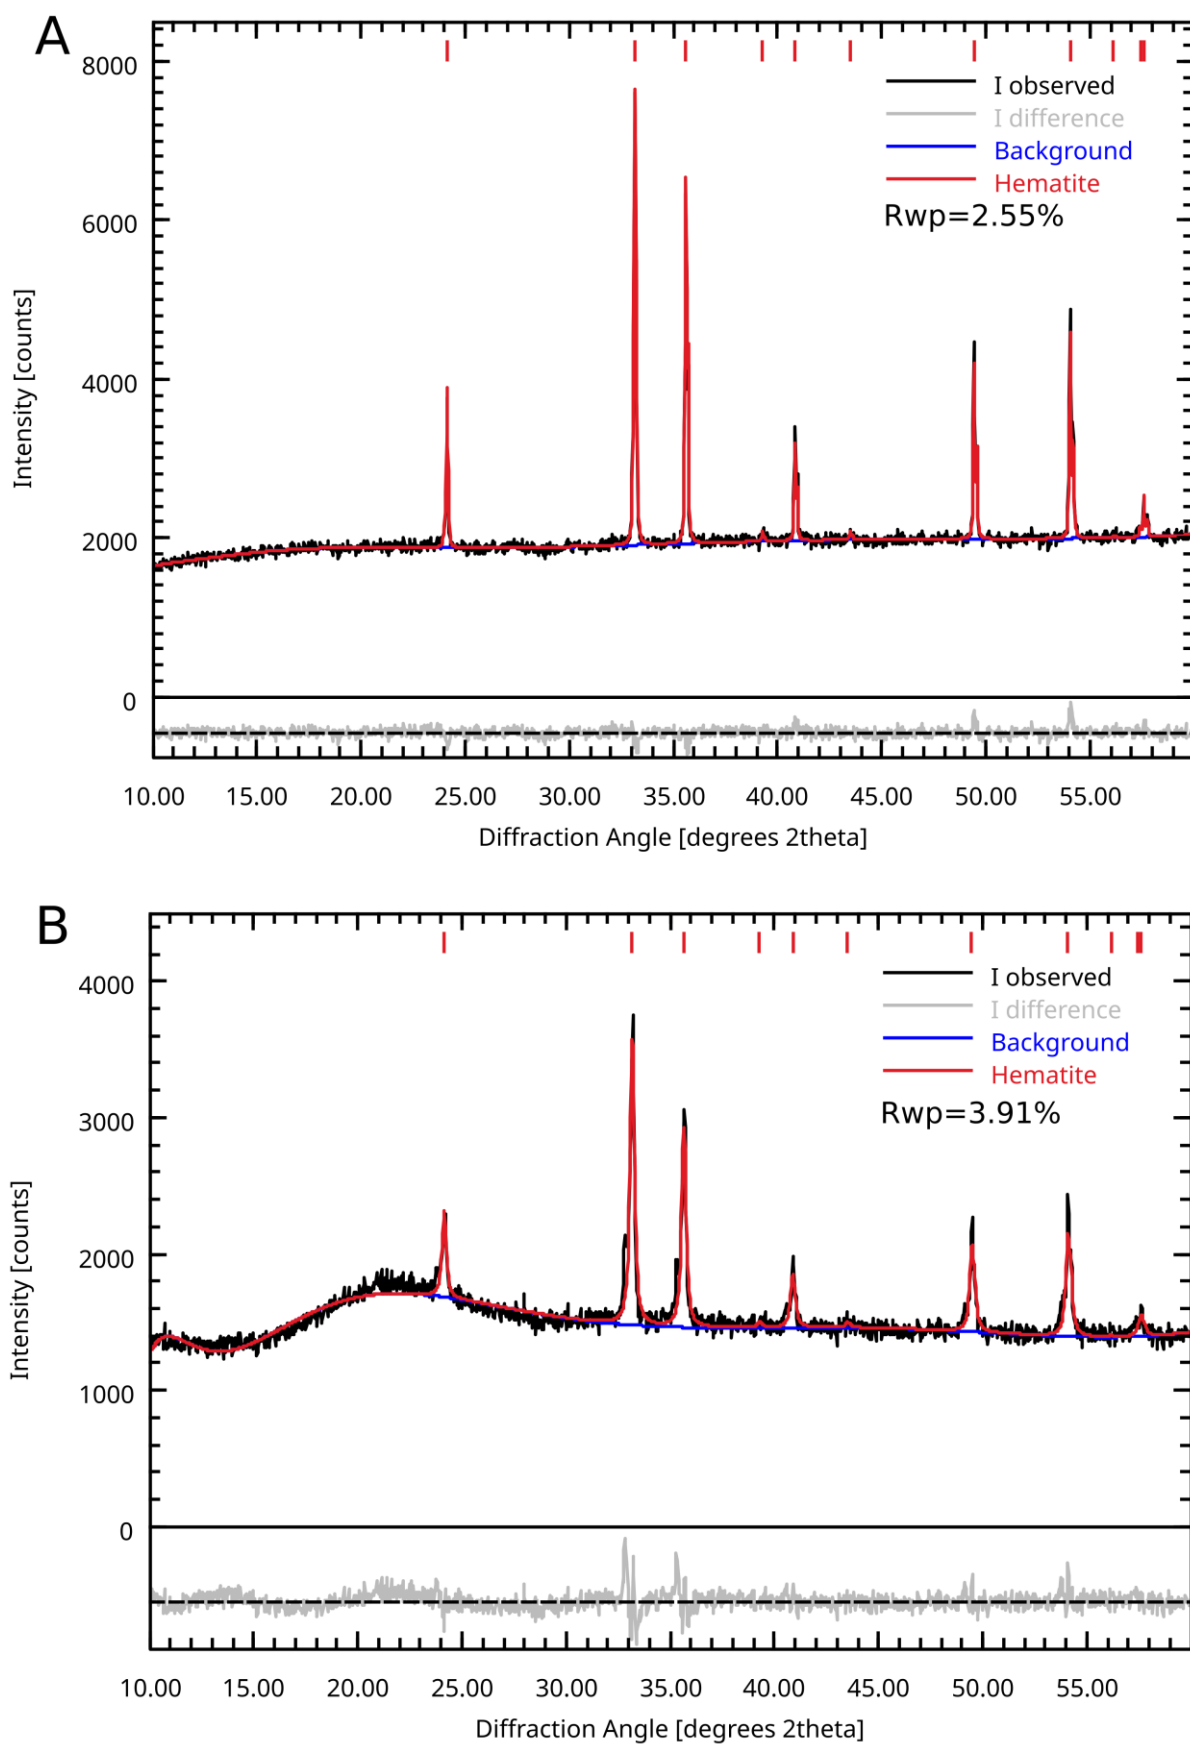

**Figure S4.** XRPD pattern of "black" vitriol before (A) and after (B) grinding. Both were identified as hematite (ref. codes reported in Tab. S1)

## Thermogravimetric Analysis

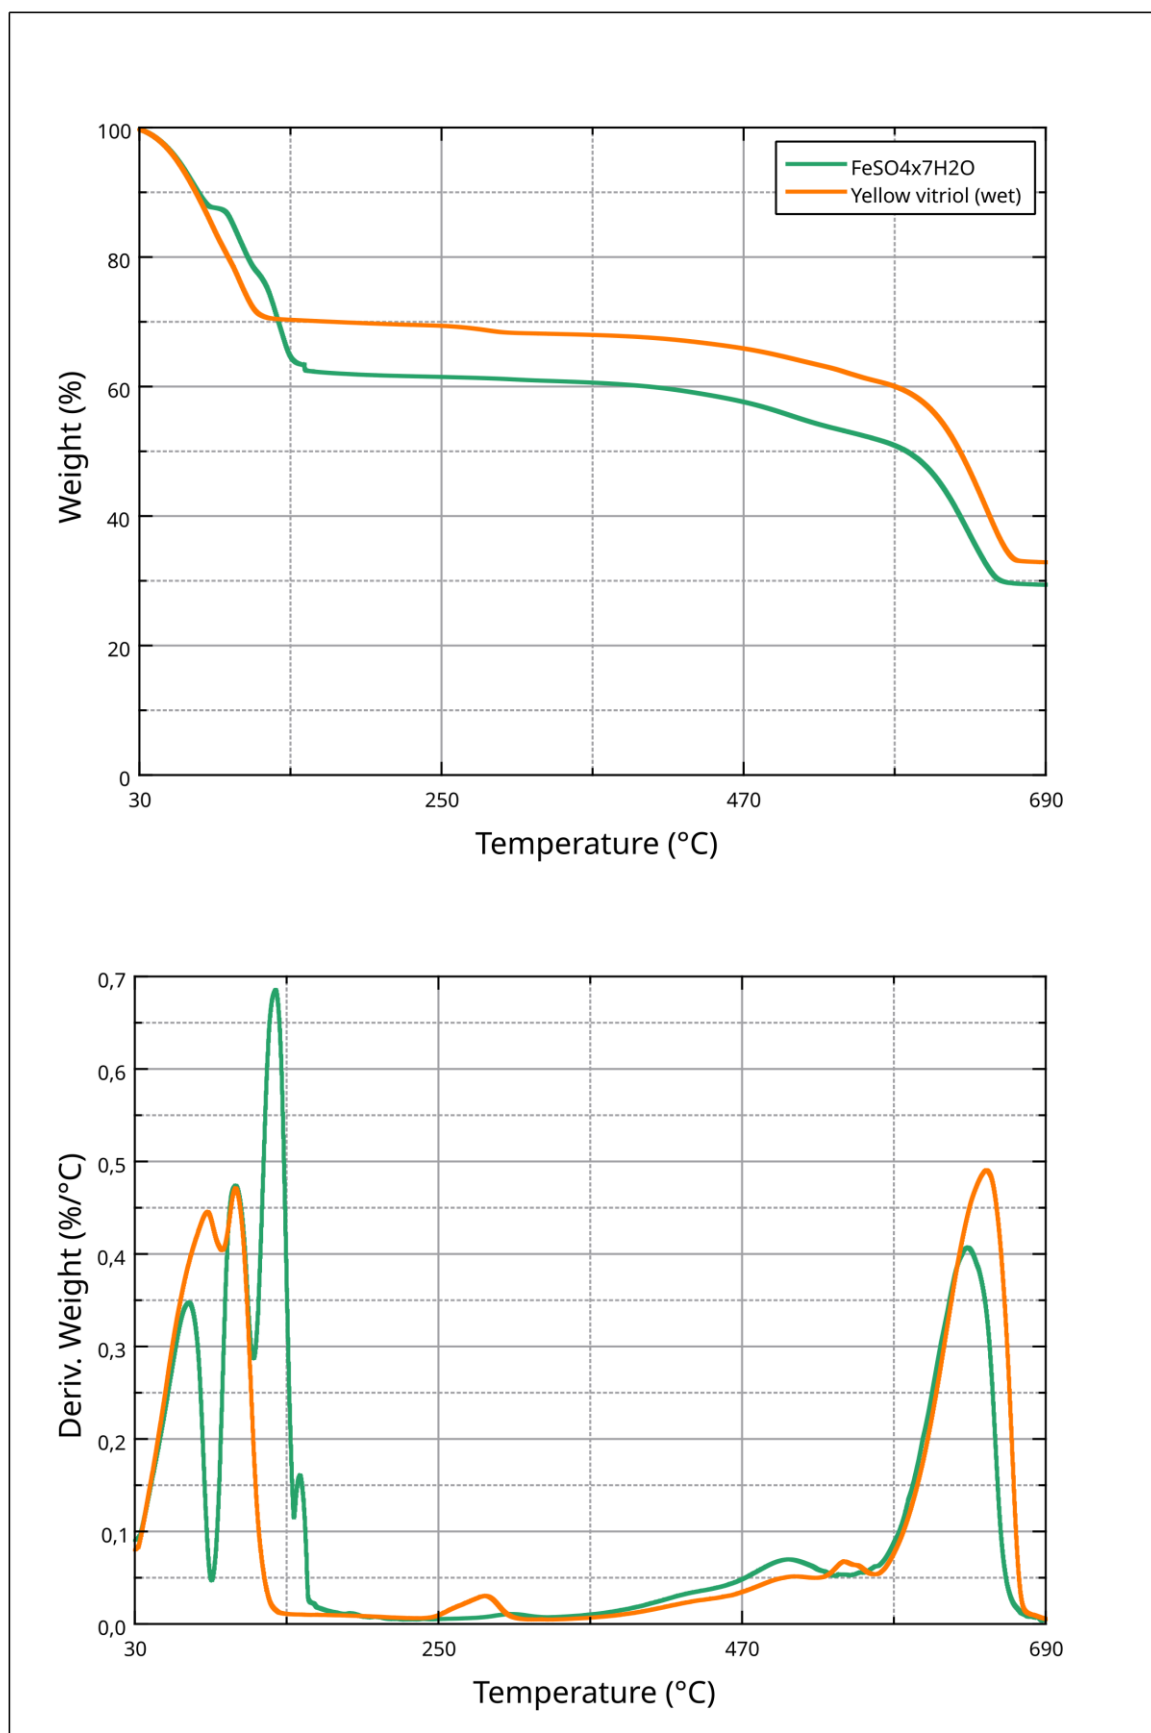

**Figure S5.** TGA of melanterite and yellow vitriol obtained from the wet method.

|                        | Theoretical Mass Loss (melanterite) | Iron sulphate heptahydrate | Theoretical mass loss (iron sulphate hexahydrate) | Yellow vitriol (wet) |
|------------------------|-------------------------------------|----------------------------|---------------------------------------------------|----------------------|
| 30°C-200°C             | 38.9%                               | 38.0%                      | 34.5%                                             | 30.0%                |
| 200°C-560°C            | 5.0%                                | 8.4%                       | 5.0%                                              | 9.1%                 |
| 560°C-690°C            | 27.4%                               | 24.0%                      | 29.8%                                             | 27.8%                |
| <b>Total mass loss</b> | <b>71.3%</b>                        | <b>70.4%</b>               | <b>69.3%</b>                                      | <b>66.9%</b>         |

**Table S2.** Percentage mass loss of Fe(II) sulphate heptahydrate and yellow vitriol (obtained from the wet method) during TGA from 30°C to 700°C, 10°C/min, under air flow.

Presuming the initial starting composition to be the same in both samples (ferrous sulphate heptahydrate), the major difference between the two scans lies in the initial water loss, which is consistent with 6 water molecules for melanterite (greenline) (38.0%, compared to a theoretical 38.9%), while for the yellow vitriol (yellow line) is of only 5 water molecules (30.0%). The TGA suggests that the yellow vitriol is closer to an hexahydrate.

Between 200°C and 560°C the scans show several, poorly defined, small thermal events which can be ascribed to the release of the remaining water molecules and the partial oxidation of the sample, with the addition of atmospheric oxygen (see Eq. 2).

The final mass is due to the presence of Fe<sub>2</sub>O<sub>3</sub>; therefore, considering the total stoichiometry and the iron oxide molecular weight (159.69 g/mol), the calculated total mass loss is 71.3%. The starting material sample behaves exactly as expected, with a total mass loss of 70.4%, while a total mass loss of 66.9% of the yellow vitriol sample more closely matches the hypothetical Fe(II) sulphate hexahydrate.

### Additional Photos

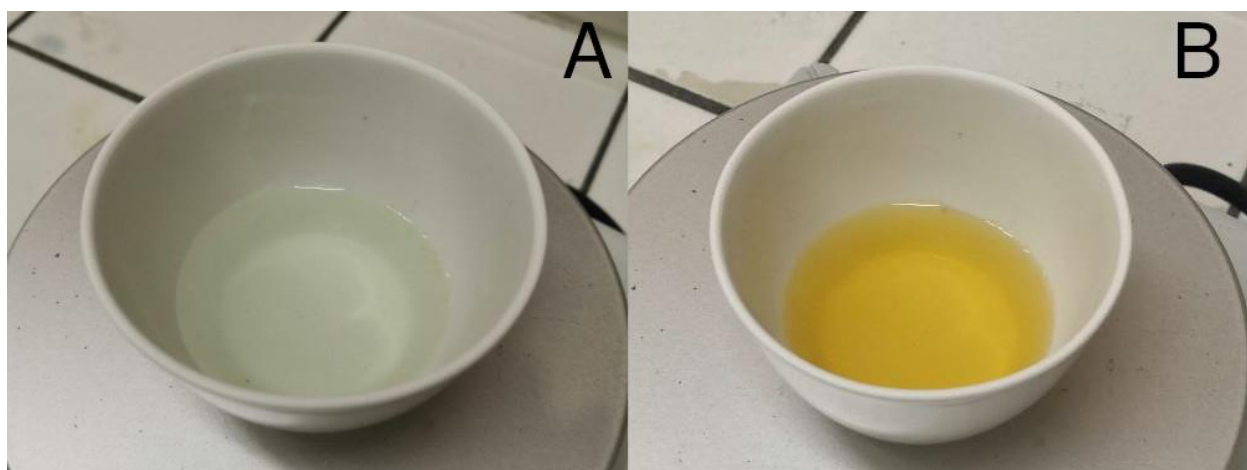

**Figure S6.** Iron (II) sulphate solution before (A) and after (B) heating.
